# Supplementary material for: The Mutationathon highlights the importance of reaching standardization in estimates of pedigree-based germline mutation rates
Source: eLife journal article supplement (doi:10.7554/elife.73577), 2022-01-12

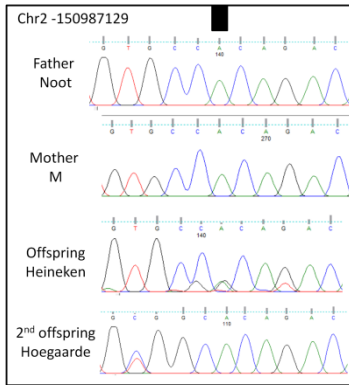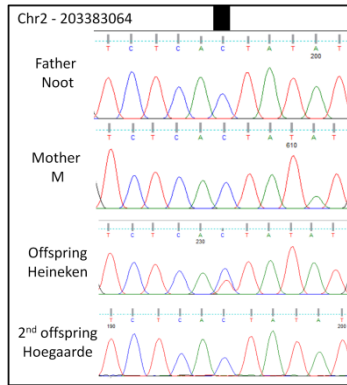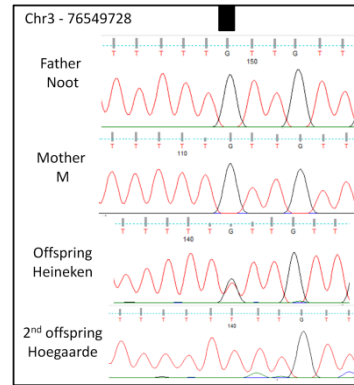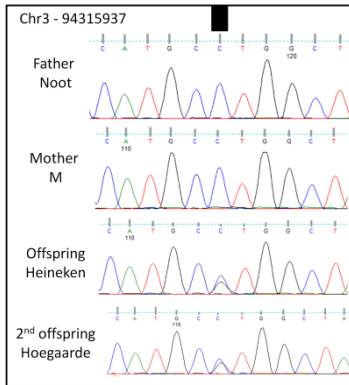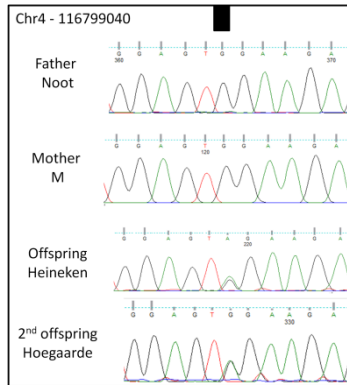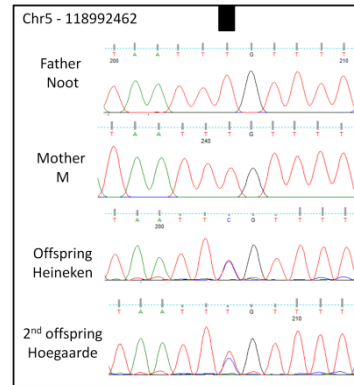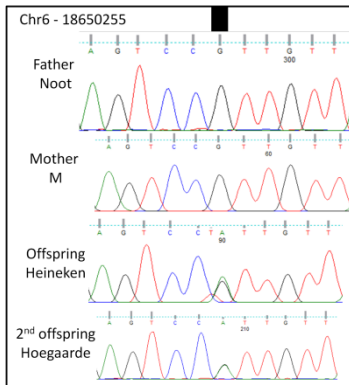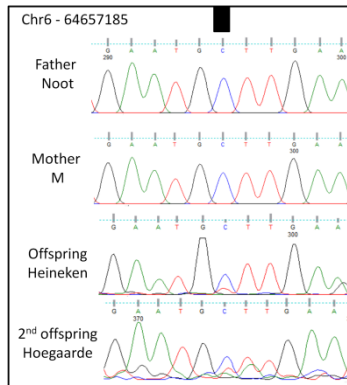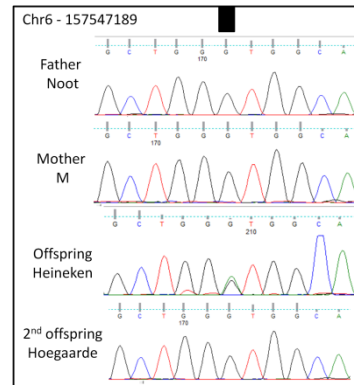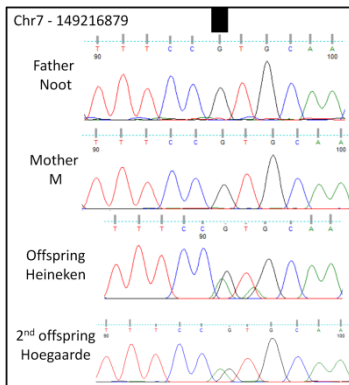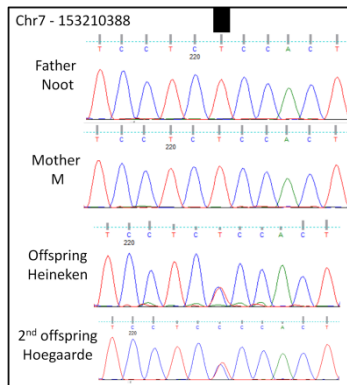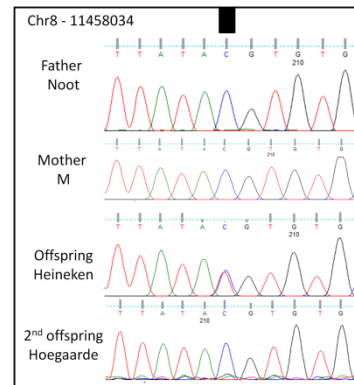

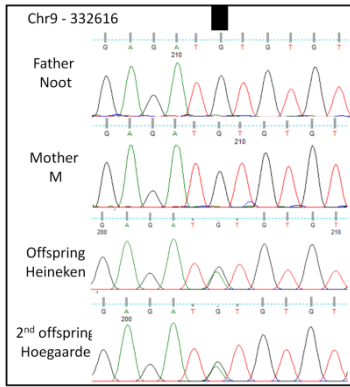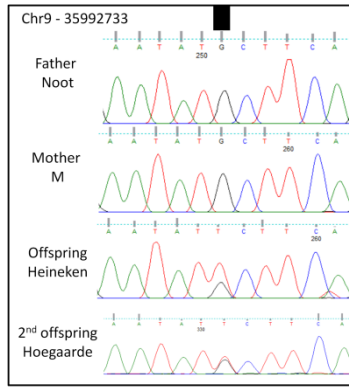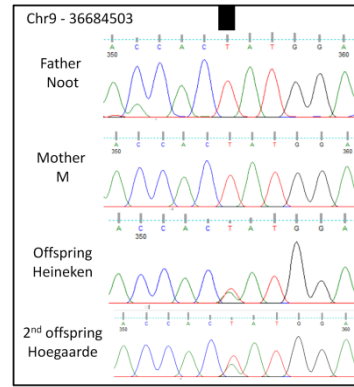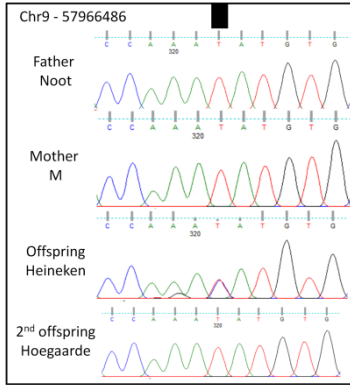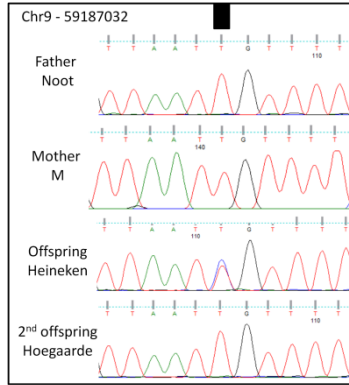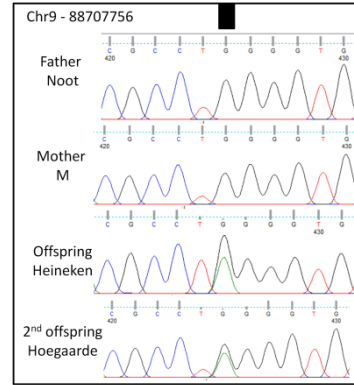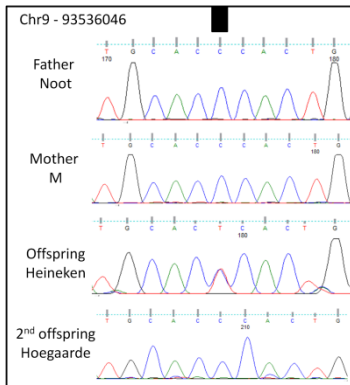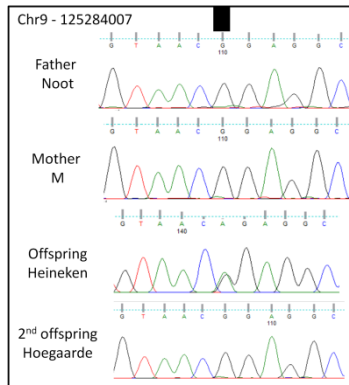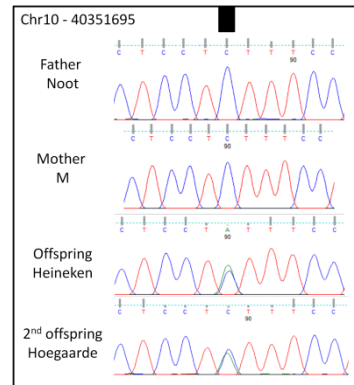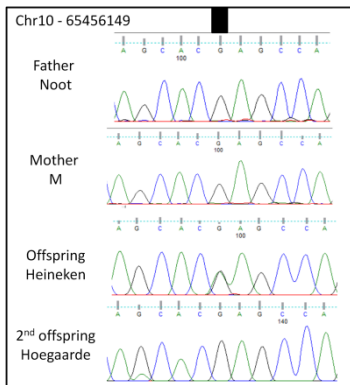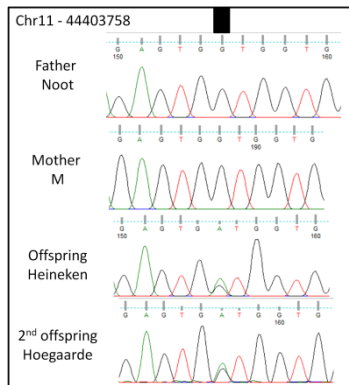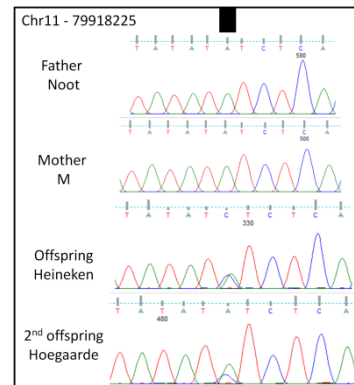

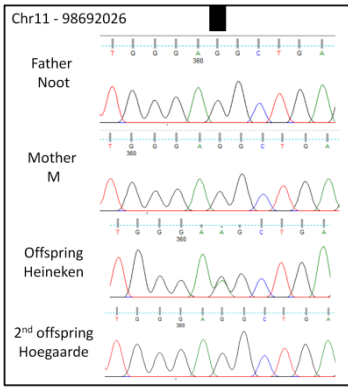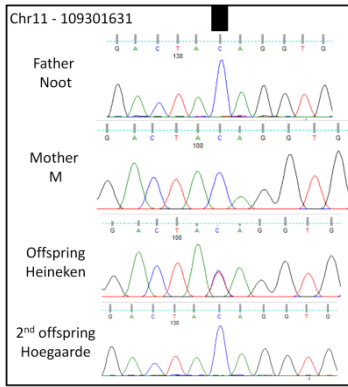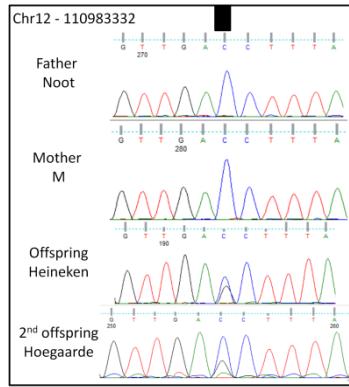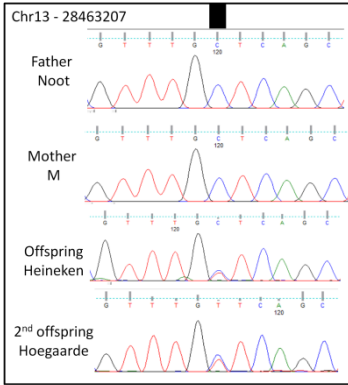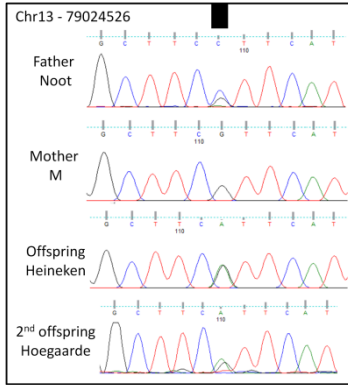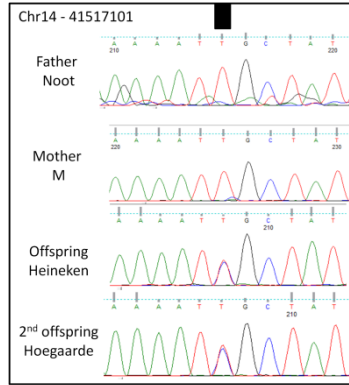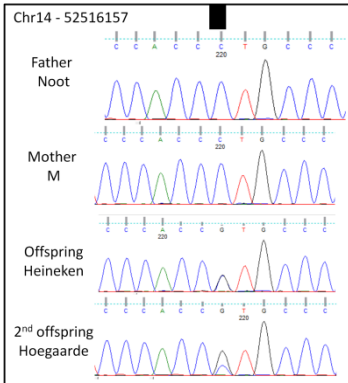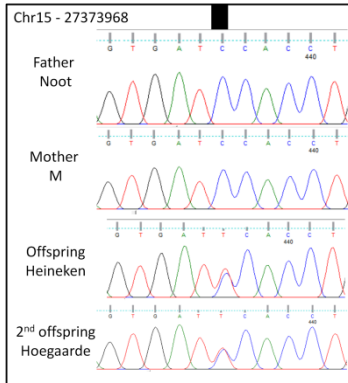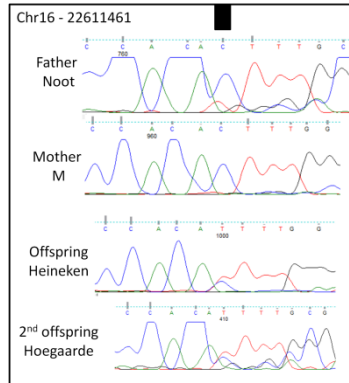

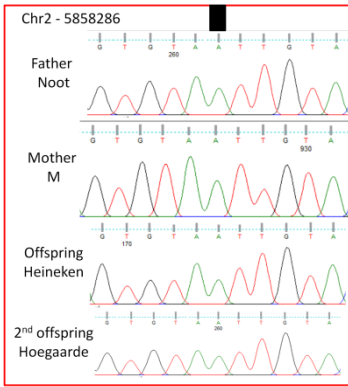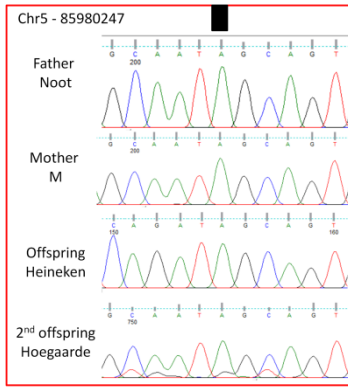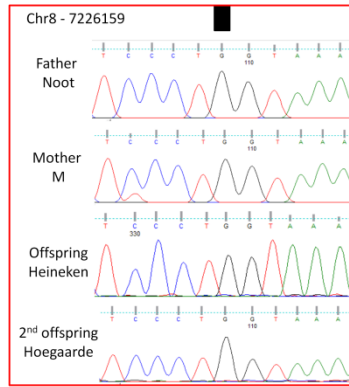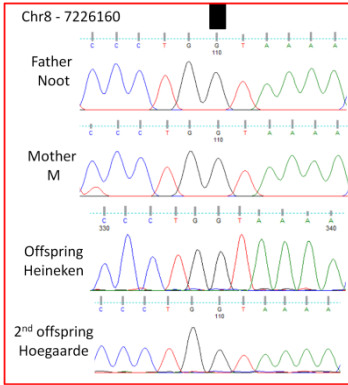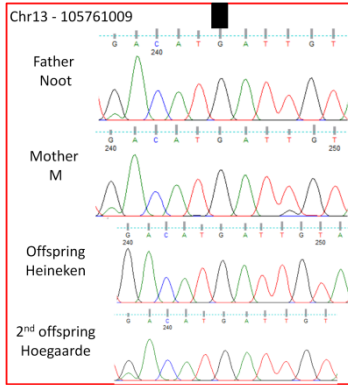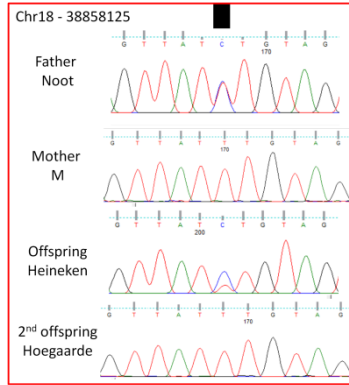

Supplement: fig3-data2 [file elife-73577-fig3-data2-v3.pdf]
