# Supplementary material for: The Mutationathon highlights the importance of reaching standardization in estimates of pedigree-based germline mutation rates
Source: eLife journal article supplement (doi:10.7554/elife.73577), 2022-01-12
Supplement: supp [file elife-73577-supp-v1.zip]

Archive with 8 entries (8 files):
- elife_poa_e73577_Figure_source_data_1.xlsx
- elife_poa_e73577_Figure_4_source_data_1.xlsx
- elife_poa_e73577_Figure_5_source_data_1.xlsx
- elife_poa_e73577_Figure_3_figure_supplement_1.pdf
- elife_poa_e73577_Figure_3_figure_supplement_2.pdf
- elife_poa_e73577_Supplementary_file_1.docx
- elife_poa_e73577_Table_2_source_data_1.xlsx
- elife_poa_e73577_Transparent_Reporting_File.docx
