# Supplementary material for: The Mutationathon highlights the importance of reaching standardization in estimates of pedigree-based germline mutation rates
Source: eLife journal article supplement (doi:10.7554/elife.73577), 2022-01-12
Supplement: supp [file elife-73577-supp-v1.zip › elife_poa_e73577_Figure_3_figure_supplement_2.pdf]

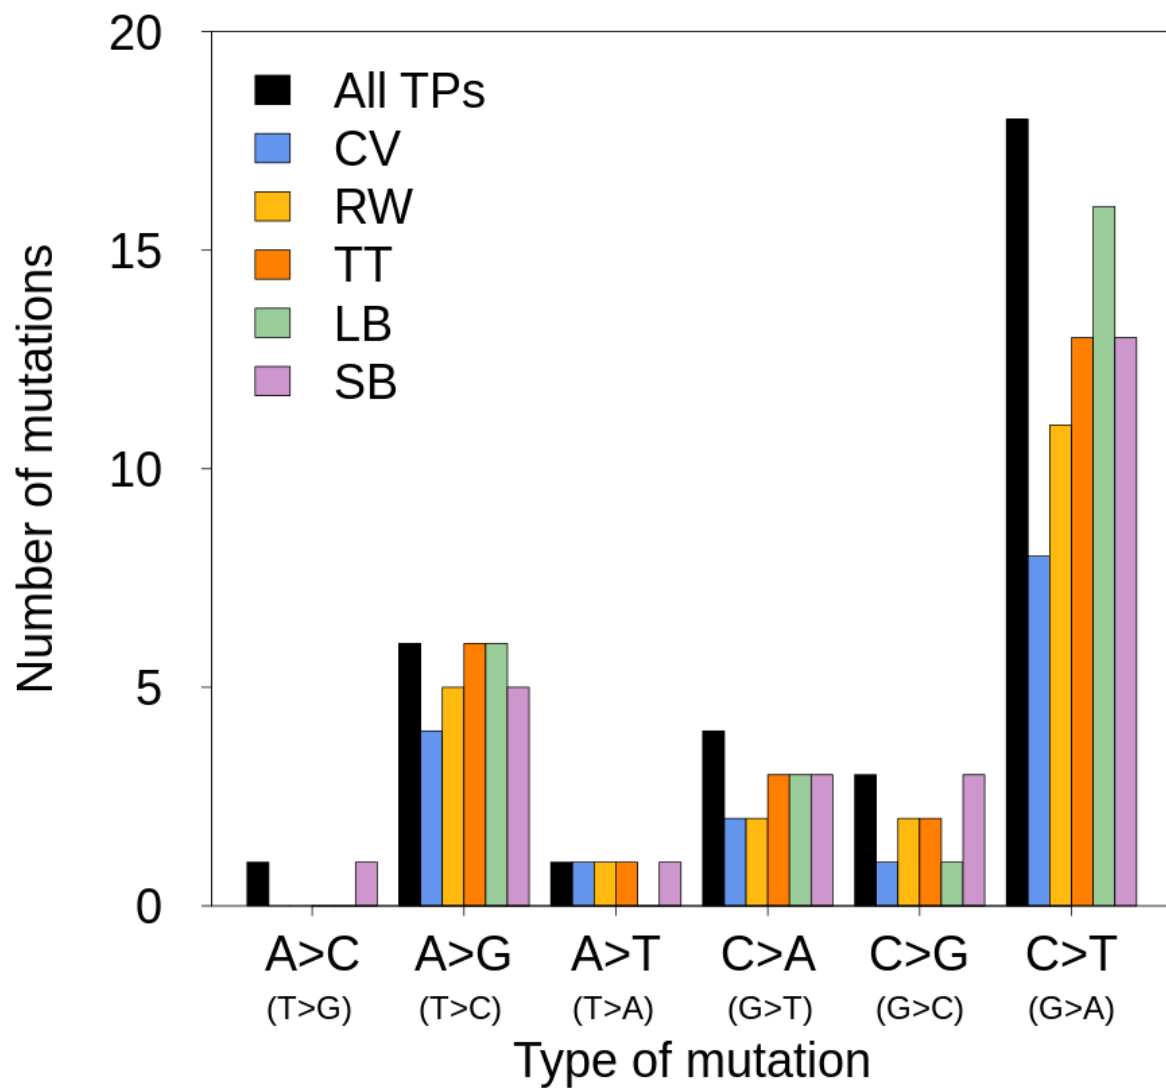

**Supplementary Figure 2 – Mutation spectrum of the trio of rhesus macaques.**

"All TPs" corresponds to all true positive DNMs validated by the PCR experiment. The different colors correspond to the true positive DNMs found by each pipeline (LB: Lucie Bergeron, SB: Søren Besenbacher, CV: Cyril Versoza, TT: Tychele Turner, and RW: Richard Wang).
