# Supplementary material for: The Mutationathon highlights the importance of reaching standardization in estimates of pedigree-based germline mutation rates
Source: eLife journal article supplement (doi:10.7554/elife.73577), 2022-01-12
Supplement: supp [file elife-73577-supp-v1.zip › elife_poa_e73577_Figure_4_source_data_1.xlsx]

## Sheet: source_data_fig4
group	candidate	CG	mu
SP	18	1.165E+09	7.73E-09
MH	22	1.29E+09	8.50E-09
TT	29	3.15E+09	4.60E-09
LB	28	2.22E+09	6.31E-09
SB	32	2.18E+09	7.34E-09
