# Supplementary material for: The Mutationathon highlights the importance of reaching standardization in estimates of pedigree-based germline mutation rates
Source: eLife journal article supplement (doi:10.7554/elife.73577), 2022-01-12
Supplement: supp [file elife-73577-supp-v1.zip › elife_poa_e73577_Figure_5_source_data_1.xlsx]

## Sheet: source_data_fig5
Individual filters	Candidate DNMs	False-positive calls	Callable genome	FNR	Mutation rate per site per generation
DP < 10	46	16	2,326,488,078	0.042	0.67 × 10−8
DP < 12	46	16	2,326,488,069	0.042	0.67 × 10−8
DP < 20; DP > 150	43	14	2,325,499,068	0.041	0.65 × 10−8
DP < 20; DP > 80	43	13	1,788,223,190	0.423	0.67 × 10−8
DP < 0.5 × dpind; DP > 2 × dpind	34	6	2,312,067,783	0.040	0.63 × 10−8
No GQ	951	870	2,371,357,494	0.041	1.8 × 10−8
GQ < 20	65	24	2,355,822,929	0.040	0.91 × 10−8
GQ < 40	42	11	2,346,070,553	0.040	0.69 × 10−8
GQ < 60	34	6	2,312,067,783	0.040	0.63 × 10−8
GQ < 80	23	0	2,147,415,676	0.039	0.56 × 10−8
GQHom < 100 and GQHet < 200	20	0	1,712,742,807	0.038	0.61 × 10−8
No AD	34	6	2,312,067,783	0.040	0.63 × 10−8
AD > 0 in at least 1 parent	34	6	2,303,628,249	0.040	0.63 × 10−8
AD > 4	33	5	2,312,079,962	0.040	0.63 × 10−8
AD > 1	32	4	2,300,625,789	0.040	0.63× 10−8
AD > 0	28	3	2,088,477,209	0.040	0.62 × 10−8
AB < 0.2	52	15	2,312,067,783	0.035	0.83 × 10−8
AB < 0.25	38	9	2,312,067,783	0.036	0.65 × 10−8
AB < 0.25; AB > 0.75	38	9	2,312,067,783	0.036	0.65 × 10−8
AB < 0.3	34	6	2,312,067,783	0.040	0.63 × 10−8
AB < 0.3; AB > 0.7	34	6	2,312,067,783	0.040	0.63 × 10−8
AB < 0.35	31	5	2,312,067,783	0.061	0.60 × 10−8
AB < 0.4; AB > 0.6	27	3	2,312,067,783	0.158	0.62 × 10−8
