# Supplementary material for: The Mutationathon highlights the importance of reaching standardization in estimates of pedigree-based germline mutation rates
Source: eLife journal article supplement (doi:10.7554/elife.73577), 2022-01-12
Supplement: supp [file elife-73577-supp-v1.zip › elife_poa_e73577_Figure_source_data_1.xlsx]

## Sheet: source data_fig3
Chromosome	Position	Ref	Alt	PCR validation	Genotypes				Transmission	Pipelines
					Heineken (offspring)	Noot (father)	M (mother)	Hoegaarde (2nd offspring)		CV	RW	TT	LB	SB	Number of pipelines
chr2	5858286	A	G	FP	A/A	A/A	A/A	A/A		x					1
chr2	60917810	A	G	not amplified								x			1
chr2	150987129	A	G	TP	A/G	A/A	A/A	A/A	no	x		x	x	x	4
chr2	203383064	C	T	TP	C/T	C/C	C/C	C/C	no	x		x	x	x	4
chr3	76549728	G	T	TP	G/T	G/G	G/G	T/T	no		x		x	x	3
chr3	94315937	C	G	TP	C/G	C/C	C/C	C/G	yes		x			x	2
chr4	116799040	G	A	TP	G/A	G/G	G/G	G/A	yes	x	x	x	x	x	5
chr5	85980247	A	G	FP	A/A	A/A	A/A	A/A		x					1
chr5	118992462	T	C	TP	C/T	T/T	T/T	T/C	yes		x	x	x	x	4
chr6	11241018	A	G	not amplified	G/A		A/A	A/G			x	x	x	x	4
chr6	18650255	G	A	TP	A/G	G/G	G/G	A/G	yes	x	x		x		3
chr6	64657185	C	T	TP	C/T	C/C	C/C	C/T	yes				x		1
chr6	157547189	G	A	TP	A/G	G/G	G/G	G/G	no	x		x	x	x	4
chr7	149216879	G	A	TP	G/A	G/G	G/G	G/A	yes	x	x	x	x	x	5
chr7	153210388	T	C	TP	T/C	T/T	T/T	T/C	yes	x	x	x	x	x	5
chr8	7226159	G	T	FP	G/G	G/G	G/G	G/G						x	1
chr8	7226160	G	T	FP	G/G	G/G	G/G	G/G						x	1
chr8	11458034	C	T	TP	C/T	C/C	C/C	C/C	no			x	x	x	3
chr9	332616	G	A	TP	A/G	G/G	G/G	A/G	yes		x	x	x	x	4
chr9	35992733	G	T	TP	T/G	G/G	G/G	T/G	yes	x		x	x	x	4
chr9	36684503	T	A	TP	T/A	T/T	T/T	T/A	yes	x	x	x		x	4
chr9	57966486	T	C	TP	T/C	T/T	T/T	T/T	no		x	x	x	x	4
chr9	58787884	T	C	not amplified									x		1
chr9	59187032	T	C	TP	T/C	T/T	T/T	T/T	no	x	x	x	x	x	5
chr9	88707756	G	A	TP	A/G	G/G	G/G	A/G	yes	x	x	x	x	x	5
chr9	93536046	C	T	TP	T/C	C/C	C/C	C/C	no				x		1
chr9	125284007	G	A	TP	A/G	G/G	G/G	G/G	no		x	x	x	x	4
chr10	40351695	C	A	TP	C/A	C/C	C/C	C/A	yes	x	x	x	x	x	5
chr10	65456149	G	A	TP	G/A	G/G	G/G	G/G	no		x	x		x	3
chr11	44403758	G	A	TP	A/G	G/G	G/G	A/G	yes				x		1
chr11	79918225	A	C	TP	A/C	A/A	A/A	A/C	yes					x	1
chr11	98692026	G	A	TP	G/A	G/G	G/G	G/G	no		x	x	x	x	4
chr11	109301631	C	T	TP	C/T	C/C	C/C	C/C	no	x	x	x	x	x	5
chr12	110983332	C	G	TP	C/G	C/C	C/C	C/G	yes			x	x	x	3
chr13	28463207	C	T	TP	T/C	C/C	C/C	T/C	yes		x	x	x	x	4
chr13	79024526	C	A	TP	A/G	C/G	G/G	A/G	yes			x			1
chr13	105761009	T	G	FP	G/G	G/G	G/G	G/G						x	1
chr14	41517101	T	C	TP	T/C	T/T	T/T	T/C	yes	x	x	x	x		4
chr14	52516157	C	G	TP	G/C	C/C	C/C	G/C	yes	x	x	x		x	4
chr15	27373968	C	T	TP	T/C	C/C	C/C	T/C	yes	x	x		x	x	4
chr16	22611461	C	T	TP	T/C	C/C	C/C	T/C	yes			x			1
chr18	38858125	T	C	FP	C/T	C/T	T/T	T/T						x	1
chr19	16726793	G	A	not amplified										x	1
