# Supplementary material for: The Mutationathon highlights the importance of reaching standardization in estimates of pedigree-based germline mutation rates
Source: eLife journal article supplement (doi:10.7554/elife.73577), 2022-01-12
Supplement: supp [file elife-73577-supp-v1.zip › elife_poa_e73577_Table_2_source_data_1.xlsx]

## Sheet: source_data_Tab2
Step of the analysis	Information to report	LB pipeline	TT pipeline	RW pipeline	CV pipeline	SB pipeline
1 – Sampling and sequencing	Type of sample	Whole blood stored in EDTA	Same as LB for Mutationathon	Same as LB for Mutationathon	Same as LB for Mutationathon	Same as LB for Mutationathon
	Age of sample	Freshly collected, stored at -80°C, and ship in dry ice.	Same as LB for Mutationathon	Same as LB for Mutationathon	Same as LB for Mutationathon	Same as LB for Mutationathon
	Type of library preparation	Libraries were not PCR-free	Same as LB for Mutationathon	Same as LB for Mutationathon	Same as LB for Mutationathon	Same as LB for Mutationathon
	Average coverage	Father 40 X and mother and offspring 70 X	Same as LB for Mutationathon	Same as LB for Mutationathon	Same as LB for Mutationathon	Same as LB for Mutationathon
	Autosomes only or with sex chromosomes?	Autosome only	Autosomes and sex chomosomes	Autosome only	Autosome and sex chromosomes	Autosome only
2 – Alignment and post-alignment processing	Trimming of adaptors and low quality reads	Yes with SOAPnuke	Same as LB for Mutationathon	Same as LB for Mutationathon	Same as LB for Mutationathon	Same as LB for Mutationathon
	Which reference assembly	Mmul 8.0.1	Mmul 8.0.1	Mmul 8.0.1	Mmul 8.0.1	Mmul 8.0.1
	Mapping software and version	BWA mem 0.7.15 with insert size option	BWA mem 0.7.17-r1188	BWA-MEM v. 0.7.12	BWA mem 0.7.15	BWA mem 0.7.15
	Removing duplicates software and version	Removed with Picard 2.7.1	Marked with Picard 2.21.4	Picard MarkDuplicates v. 1.105	Picard MarkDuplicates v. 2.18.3	Samtools 1.6.0
	Base quality score recalibration (yes/no)	No	No	No	Yes	Yes
	If yes, which type of data used as known variants	N/A	N/A	N/A	dbSNP build 150	Harris et. al, 2020 (https://doi.org/10.1186/s12862-020-1595-9)
	Realignments around indels?	No	No	No	No	Yes
	Other filters?	Removing reads mapping to multiple locations of the genome with samtools 0.1.18	No	No	2nd round of Picard MarkDuplicates v. 2.18.3 (post-BQSR)	Use GATK PrintReads with the following filters: BadCigar, DuplicateRead, FailVendorQualityCheck, HCMappingQuality, MappingQualityUnavailable, NotPrimaryAlignment, UnmappedRead, filter_bases_not_stored, filter_mismatching_base_and_quals
3 – Variant calling	Software and version	GATK 4.0.7.0	GATK 3.5.0, freebayes v1.3.2-40-gcce27fc, Platypus2 v 0.8.1.1, Strelka2 v 2.9.10	GATK 4.1.7.0	GATK 3.7	GATK 3.8
	Mode: joint genotyping? Gvcf blocks? Gvcf in base-pair resolution?	HaplotypeCaller in BP-RESOLUTION per individuals; combined individuals with CombineGVCFs; joint genotyping with GenotypeGVCF	joint-genotyping across crams	HaplotypeCaller, joint call with GenotypeGVCF, followed by CalculateGenotypePosterior. Not bp resolution.	HaplotypeCaller in BP-RESOLUTION; joint genotyping with GenotypeGVCF	HaplotypeCaller with all sample at once
4 – Detecting de novo mutations	Site filters on vcf files and justification	QD < 2.0, FS > 20.0, MQ < 40.0, MQRankSum < - 2.0, MQRankSum > 4.0, ReadPosRankSum < - 3.0, ReadPosRankSum > 3.0 and SOR > 3.0. The filters were chosen to reduce false-positive calls after a first manual curation of the candidates using the recommended filters.	Mother genotype = 0/0, Father genotype = 0/0, Child genotype = 0/1 or 1/1 or 1/0 or 0|1 or 1|1 or 1|0. Remove variants in recent repeats. Remove variants in homopolymers of AAAAAAAAAA or TTTTTTTTTT	QD < 2.0 || MQ < 40.0 || FS > 60.0 || SOR > 3.0 || MQRankSum < -12.5 || ReadPosRankSum < -8.0. Our standard set of hard filters for genotype calling.	autosomal biallelic SNPs fully genotyped in the extended trio, GATK Best Practices hard filter criteria	FS > 30.0, MQRankSum < - 10, MQRankSum > 10, ReadPosRankSum < - 2.5, ReadPosRankSum > 2.5, BaseQRankSum < -13, BaseQRankSum >13
	Individual filters, threshold, and remaining candidates after each filter	Mendelian violation parents HomRef and offspring Het (11,779 candidates); AB: 0.3 and 0.7 (candidates 5,527); DP : 0.5 × depth individual and 2 × depth individual ; 20 X to 78X for the father, 30X to 121X for the mother, and 31X to 125X for the offspring ( 951 candidates); GQ: 60 (34 candidates); AD: none	No evidence of alternate allele in Father, No evidence of alternate allele in mother, AB in child > 0.25, depth in each individual >= 10, genotype quality > 20	Mendelian violations where parents were HomRef and offspring was Het. 20 < DP < 80. Alt AB > 0.35. GQ > 20. Alt AD < 1 in parent. Alt ADF > 0, ADR > 0 in offspring	Mendelian violation where parents were HomRef and offspring was Het. 0.5 × DPind & 2 × DPind; 0.25<=AB<=0.75; GQ>=40; ADalt = 0 in parents	Mendelian violation, parents HomRef and offspring Het; AB: >0.3; DP: min 10 and max 1.75x median of individual; GQ: min 55; no good qual(>20) alt reads in parents and max 1 bad qual(<20) read; alt allele should be seen on both strands in child
	False discovery rate estimation method: PCR validation? Manual curation? Transmission rate deviation?	Manual curation with IGV and removed 6 candidates (28 final candidates)	Since there was no low-complexity region (LCR) annotation file for rheMac8, I did do a samtools tview assessment of all candidate DNVs. After removing all DNVs in LCRs there were 34 high-confidence DNVs (29 SNVs [2 at CpG sites], 4 INDELS, 1 MNV)	Manual curation with IGV, but no candidates were removed. High transmission rate noted (72%), but not used to adjust rate estimate.	-	Assumes filters are set so conservatively that no false positives remain
5 – Mutation rate estimation	Method to access callability: File used? Filters took into account?	All sites passing the DP and GQ filters on the BP resolution vcf files (including all sites in the genome).	For mutation rate estimation, I assessed the length of the genome without gaps or other regions excluded from variant calling (ungapped length = 3142076610 bp). Only assessed SNVs for the mutation rate estimation. For me it was 29 SNVs / (3142076610 bp *2) = 0.46 x 10-8 substitutions per site per generation	Our equivalent here would be the enumeration of sites from samtools mpileup that pass the DP filter	applied the same filters as for DNM detection on the BP resolution .vcf (including all sites in the genome)	The callability of each site is inferred as a probability conditional on the depth in each of member of the trio. These probabilities are then summed. See Besenbacher 2015, Nat. Comm.
	False-negative rate estimation method: simulation? Filters? Probability?	Proportion of sites expected to be filtered away by the 2 remaining filters: the site filters (following known distributions) and the allelic balance filter (proportion of true heterozygotes outside AB filters).	-	Our equivalent estimate of FNR would be the product of parental homozygote callability and offspring heterozygous callability. We sample 250k high-quality SNPs for each of the two categories and subject them respectively to the parental and offspring filters used for the de novo candidates. The proportion of remaining SNPs after all filtering are interpreted as the probability that a true de novo…	-	The false negative rate of all filters except the site filters are incorporated in the number callable sites estimates as explained above. The sites filters used follow a known null distribution an we use correct for the expected false negative rates of those.
